# Supplementary material
Source: Research Square preprint supplement (doi:10.21203/rs.3.rs-9328548/v1)
Supplement: Supplementary file 1 [file 833e98ae7afbd1f1ca807c07.xlsx]

## Sheet: Metadados 
Aerial behaviors
Behaviors	Acronym	References
Jump	JU	Lusseau (2006)​; Marulanda-Padilla et al. (2021)
Synchronized leap	SL	Marulanda-Padilla et al. (2021); Connor et al. (2025)
Lateral leap	SB	Lusseau (2006)sciencedirect​
Partial leap	PL	Lusseau (2006)sciencedirect​
Tail-out	TO	Lusseau (2006)sciencedirect​
Porpoising	PO	Weihs (2002); Zhu et al. (2021)
Position alternation	PA	Baker et al. (2017); Cipriano et al. (2015)
Locomotion/ swimming
Behaviors	Acronym	References
Surfacing / Surface respiration	SR	Mortola & Limoges (2006)
Synchronized breathing	SBH	McGregor et al. (2025); Randić et al. (2023); Shelton et al. (2010)
Bow-riding	BR	Hawkins & Gartside (2009)​; Levenson et al. (2024)
Traveling	TR	Baker et al. (2017); Henderson et al. (2019)
Lateral swimming	LS	Baker et al. (2017)
Vessel approach	VA	Mills et al. (2023)
Avoidance	AV	Mills et al. (2023); Christiansen et al. (2010)
Shallow dive with escape	AD	Mills et al. (2023)
Fast travel	FT	Baker et al. (2017); Henderson et al. (2019)
Feeding
Behaviors	Acronym	References
Active pursuit	PC	Rossman et al. (2017); Miller et al. (2021)
Association with fishing vessel	AFV	Miller et al. (2021)​; Rechimont et al. (2018)
Opportunistic feeding at fishing gear	DEP	Powell & Wells (2011); Garagouni et al. (2022); Svane et al. (2022); Rechimont et al. (2018)
